# Supplementary material for: Combination of Immune Checkpoint Inhibitors and Liver-Specific Therapies in Liver-Metastatic Uveal Melanoma: Can We Thus Overcome Its High Resistance?
Source: MDPI journal article supplement (doi:10.3390/cancers13246390), 2021-12-20
Supplement: s1 [file s1]

*Article*

# Combination of immune checkpoint inhibitors and liver-specific therapies in liver-metastatic uveal melanoma: Can we thus overcome its high resistance?

Special issue: Advances in the Treatment of Metastatic Uveal Melanoma

## SUPPLEMENTARY MATERIALS

|                  |                                                                                                 |
|------------------|-------------------------------------------------------------------------------------------------|
| <b>Table S1</b>  | Therapy of liver-metastatic Uveal Melanoma                                                      |
| <b>Table S2</b>  | Laboratory values at Baseline                                                                   |
| <b>Figure S1</b> | Flow chart on cohort composition                                                                |
| <b>Figure S2</b> | Effect of LDH at Baseline on overall survival of patients with liver-metastatic Uveal Melanoma  |
| <b>Figure S3</b> | Effect of S100 at Baseline on overall survival of patients with liver-metastatic Uveal Melanoma |
| <b>Figure S4</b> | Effect of NLR at Baseline on overall survival of patients with liver-metastatic Uveal Melanoma  |
| <b>Figure S5</b> | Effect of lung metastases on overall survival of patients with liver-metastatic Uveal Melanoma  |

**Table S1.** Therapy of liver-metastatic Uveal Melanoma

| Therapy of liver-metastatic UM         | n (%)     | Cumulated % |  |  |
|----------------------------------------|-----------|-------------|--|--|
| <b>Therapy completed</b>               |           |             |  |  |
| No                                     | 3 (6.7)   | 6.7         |  |  |
| Yes                                    | 35 (77.8) | 84.4        |  |  |
| Therapy during data collection         | 7 (15.6)  | 100.0       |  |  |
| <b>Therapies performed</b>             |           |             |  |  |
| Surgical resection of liver metastases | 11 (26.2) |             |  |  |
| Liver-directed therapy                 | 23 (54.8) |             |  |  |
| Systemic therapy                       | 35 (83.3) |             |  |  |
| <b>Liver-directed therapy</b>          |           |             |  |  |
| TACE                                   | 20 (44.4) |             |  |  |
| SIRT                                   | 2 (4.4)   |             |  |  |
| Chemosaturation                        | 1 (2.2)   |             |  |  |
| <b>Systemic therapy</b>                |           |             |  |  |
| Dual ICI (Ipilimumab+Nivolumab)        | 20 (44.4) |             |  |  |
| Anti-PD-1 (Nivolumab/Pembrolizumab)    | 4 (8.9)   |             |  |  |
| Chemotherapy (Gemcitabine/Decarbazine) | 6 (13.3)  |             |  |  |
| Anti-CTLA-4 (Ipilimumab)               | 5 (11.1)  |             |  |  |
| Targeted Therapy (Trametinib)          | 3 (6.7)   |             |  |  |

| Therapy regimens                             | n (%) <sup>1</sup> | Cumulated % | Median OS (months) | n events <sup>2</sup> |
|----------------------------------------------|--------------------|-------------|--------------------|-----------------------|
| <i>Cohort 1</i>                              | <b>19 (45.2)</b>   |             |                    |                       |
| Dual ICI + Surgical resection                | 4 (9.5)            | 52.4        | 55.65              | 1                     |
| Anti-PD-1 + Surgical resection               | 1 (2.4)            | 54.8        | 4.2                | 1                     |
| Dual ICI + TACE                              | 8 (19.0)           | 76.2        | 10.23              | 6                     |
| Dual ICI + Chemosaturation                   | 1 (2.4)            | 78.6        | 32.4               | 0                     |
| Anti-PD-1 + SIRT                             | 1 (2.4)            | 81.0        | 22.5               | 1                     |
| Anti-CTLA-4 + TACE                           | 2 (4.8)            | 85.8        | 18.68              | 2                     |
| Dual ICI + TACE + Surgical resection         | 1 (2.4)            | 93.0        | 25.93              | 1                     |
| Anti-PD-1 + SIRT + Surgical resection        | 1 (2.4)            | 95.4        | 44.13              | 0                     |
| <i>Cohort 2</i>                              | <b>23 (54.8)</b>   |             |                    |                       |
| Surgical resection alone                     | 1 (2.4)            | 2.4         | 42                 | 0                     |
| Liver-directed therapy (TACE) alone          | 5 (11.9)           | 14.3        | 7.17               | 5                     |
| Dual ICI alone                               | 6 (14.3)           | 28.6        | 4.25               | 4                     |
| Anti-PD-1 alone                              | 1 (2.4)            | 31.0        | 5.63               | 1                     |
| Chemotherapy + Anti-CTLA-4                   | 3 (7.1)            | 38.1        | 15.63              | 3                     |
| Targeted therapy alone                       | 1 (2.4)            | 40.4        | 11.37              | 1                     |
| IMCgp-100 alone                              | 1 (2.2)            | 42.9        | 4.77               | 0                     |
| Chemotherapy + Surgical resection            | 1 (2.4)            | 57.2        | 10.7               | 1                     |
| Chemotherapy + TACE                          | 2 (4.8)            | 90.6        | 25.13              | 1                     |
| Targeted therapy + TACE + Surgical resection | 1 (2.4)            | 97.7        | 28.87              | 1                     |
| TACE + Surgical resection                    | 1 (2.4)            | 100.0       | 3.67               | 0                     |

Note. <sup>1</sup>Percentages refer to n=patients who underwent treatment. <sup>2</sup>events are defined as death, all other patients were censored.

**Table S2.** Laboratory values at Baseline

| Laboratory: Baseline <sup>1</sup>        | No. (%) <sup>2</sup> | Median | Interquartile difference | Elevated, no. (% <sup>4</sup> ) |
|------------------------------------------|----------------------|--------|--------------------------|---------------------------------|
| LDH (120-246 U/l)                        | 35 (77.8)            | 293    | 214                      | 24 (68.6)                       |
| S100 (-0.15 µg/l)                        | 27 (60.0)            | .06    | .13                      | 7 (25.9)                        |
| Eosinophile Granulocytes (0.1-0.5 Mrd/l) | 32 (71.1)            | .17    | .23                      | 4 (12.5)                        |
| NLR <sup>3</sup> (-3.5)                  | 32 (71.1)            | 3.12   | 2.2                      | 14 (43.8)                       |

Note. <sup>1</sup>"Baseline": Laboratory values prior to initial system therapy. If no systemic therapy was given, an alternative laboratory was chosen. <sup>2</sup>Since not all laboratory values were available for every patient, "No. (%)" indicates how many laboratory values were included in the statistics. <sup>3</sup> Neutrophil-to-Lymphocyte-Ratio. <sup>4</sup> Elevated parameters in relation to the total number of parameters collected (= valid percentages).

Figure S1

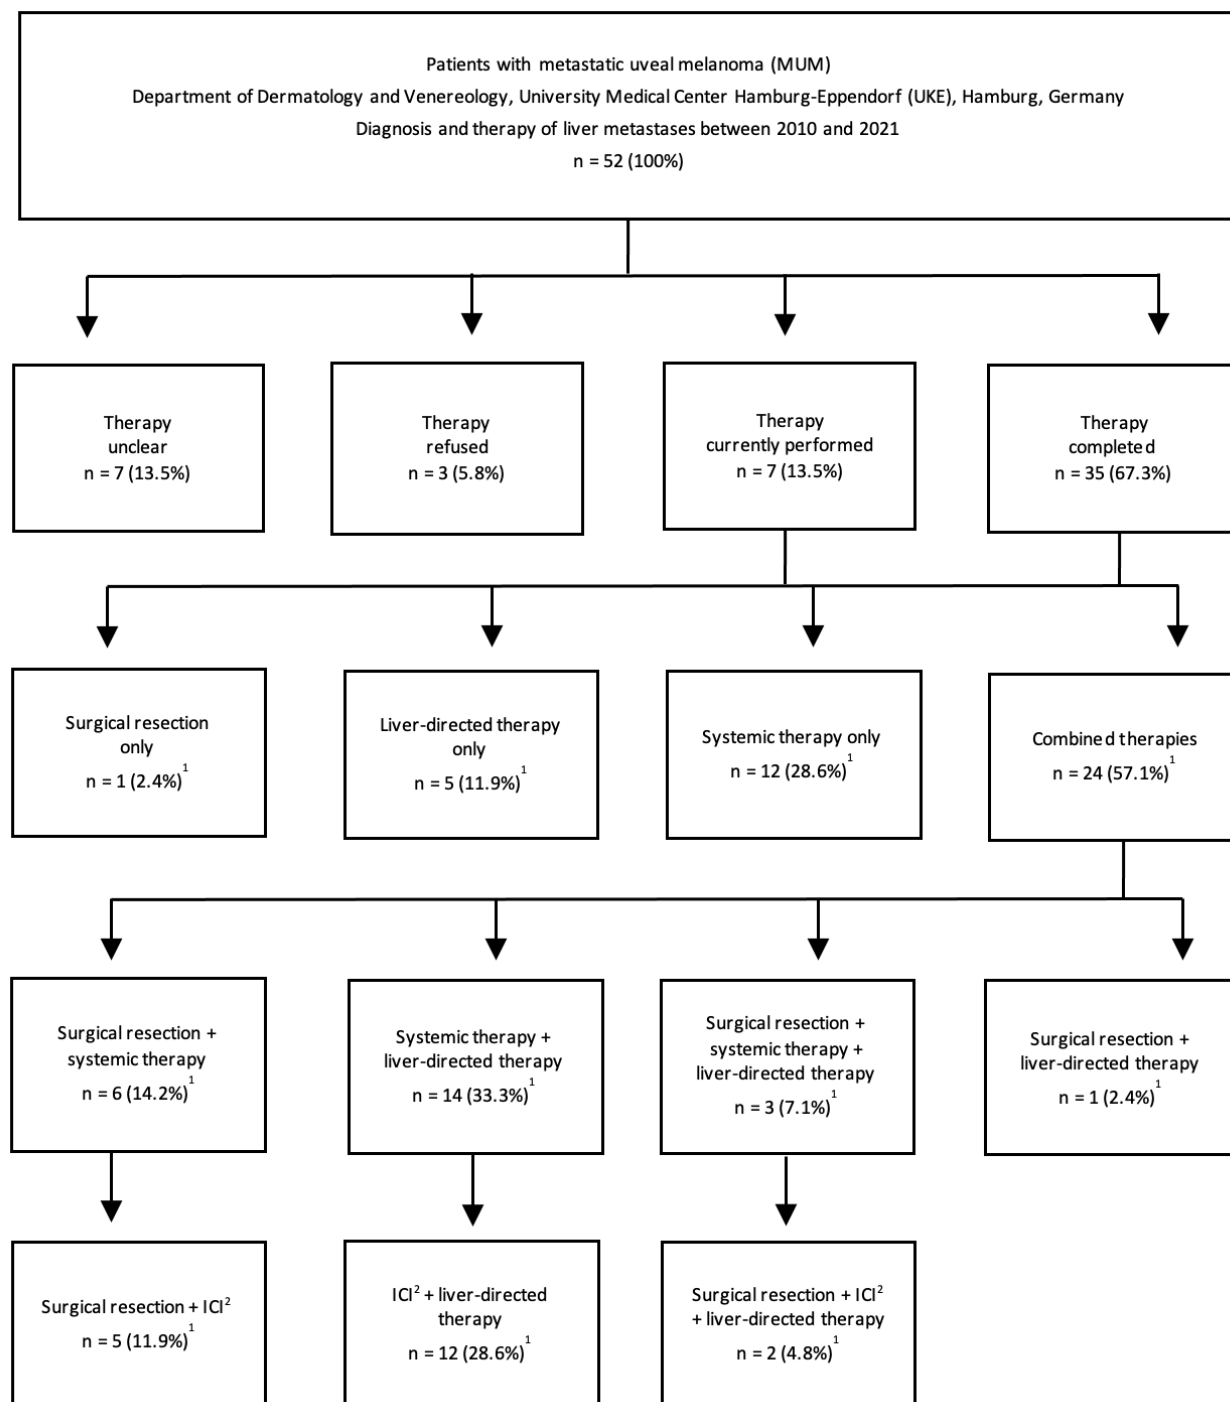

**Figure S1** Flow chart on cohort composition. *Note.* <sup>1</sup>Percentages refer to a total of n=42 patients whose metastatic disease has been treated. <sup>2</sup>“ICI” includes dual anti-PD-1 (Nivolumab) plus anti-CTLA-4 (Ipilimumab) as well as anti-PD-1 (Nivolumab or Pembrolizumab) or anti-CTLA-4 (Ipilimumab) alone.

Figure S2

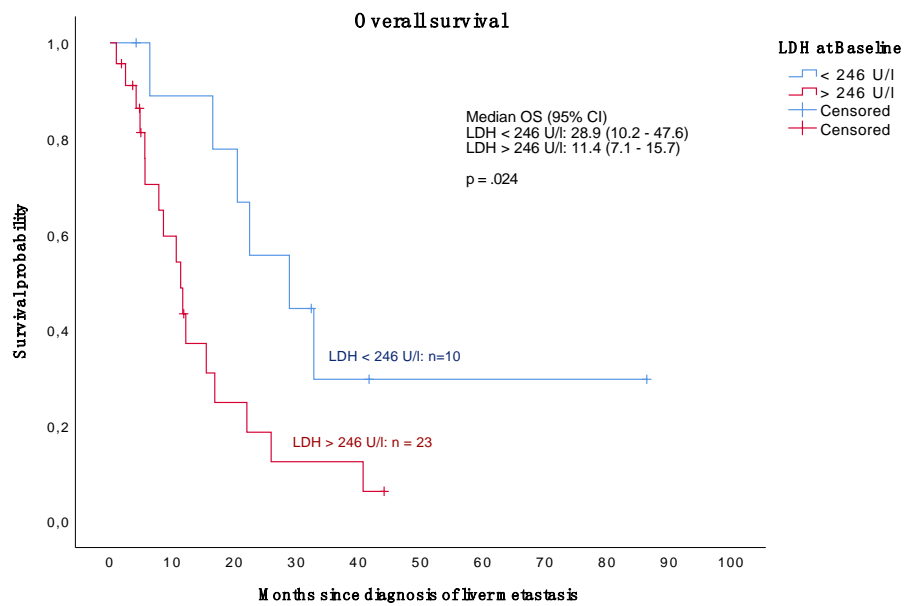

Figure S2 Effect of LDH at Baseline on overall survival of patients with liver-metastatic Uveal Melanoma (n=33; Cut-Off: 246 U/l).

Figure S3

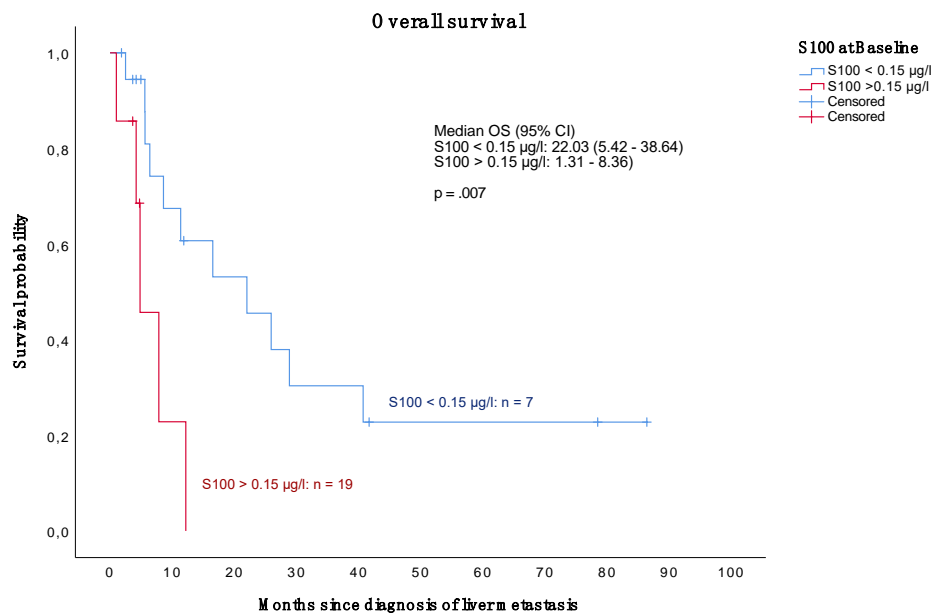

Figure S3 Effect of S100 at Baseline on overall survival of patients with liver-metastatic Uveal Melanoma (n=26; Cut-Off: 0.15 µg/l).

Figure S4.

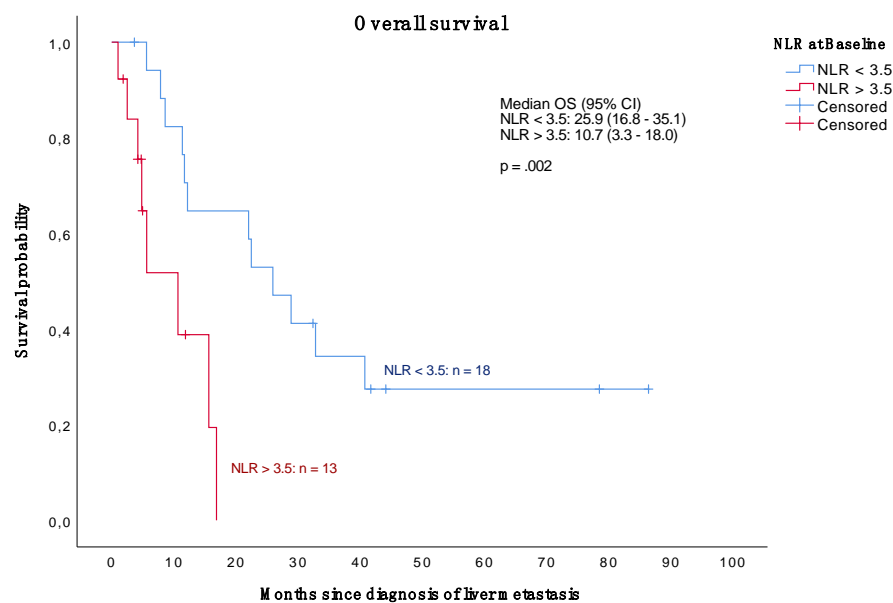

**Figure S4** Effect of NLR (Neutrophil-to-Lymphocyte Ratio) at Baseline on overall survival of patients with liver-metastatic Uveal Melanoma (n=31; Cut-Off: 3.5).

Figure S5.

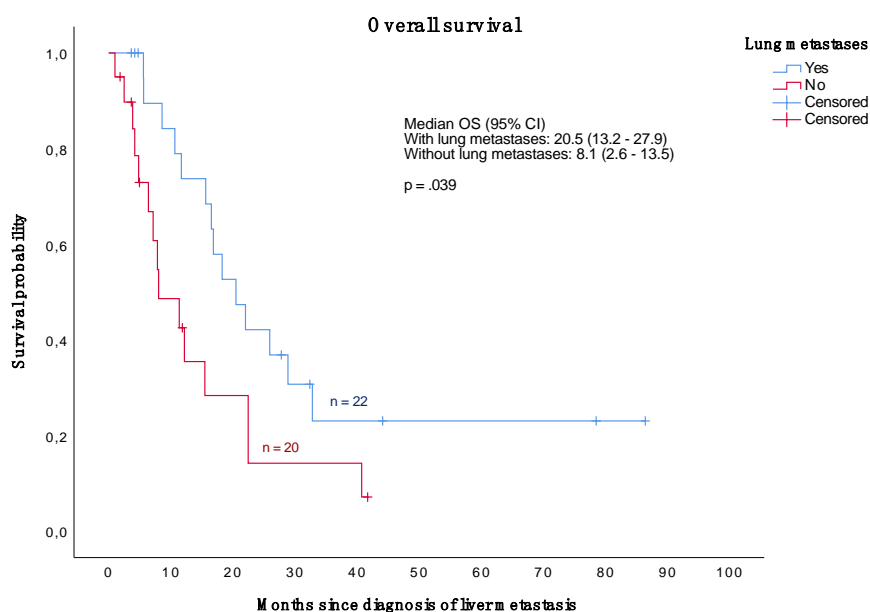

**Figure S5** Effect of lung metastases on overall survival of patients with liver-metastatic Uveal Melanoma (n=42).
